# Supplementary material for: Glutathione Enhances Auxin Sensitivity in Arabidopsis Roots
Source: MDPI journal article supplement (doi:10.3390/biom10111550), 2020-11-13
Supplement: s1 [file s1]

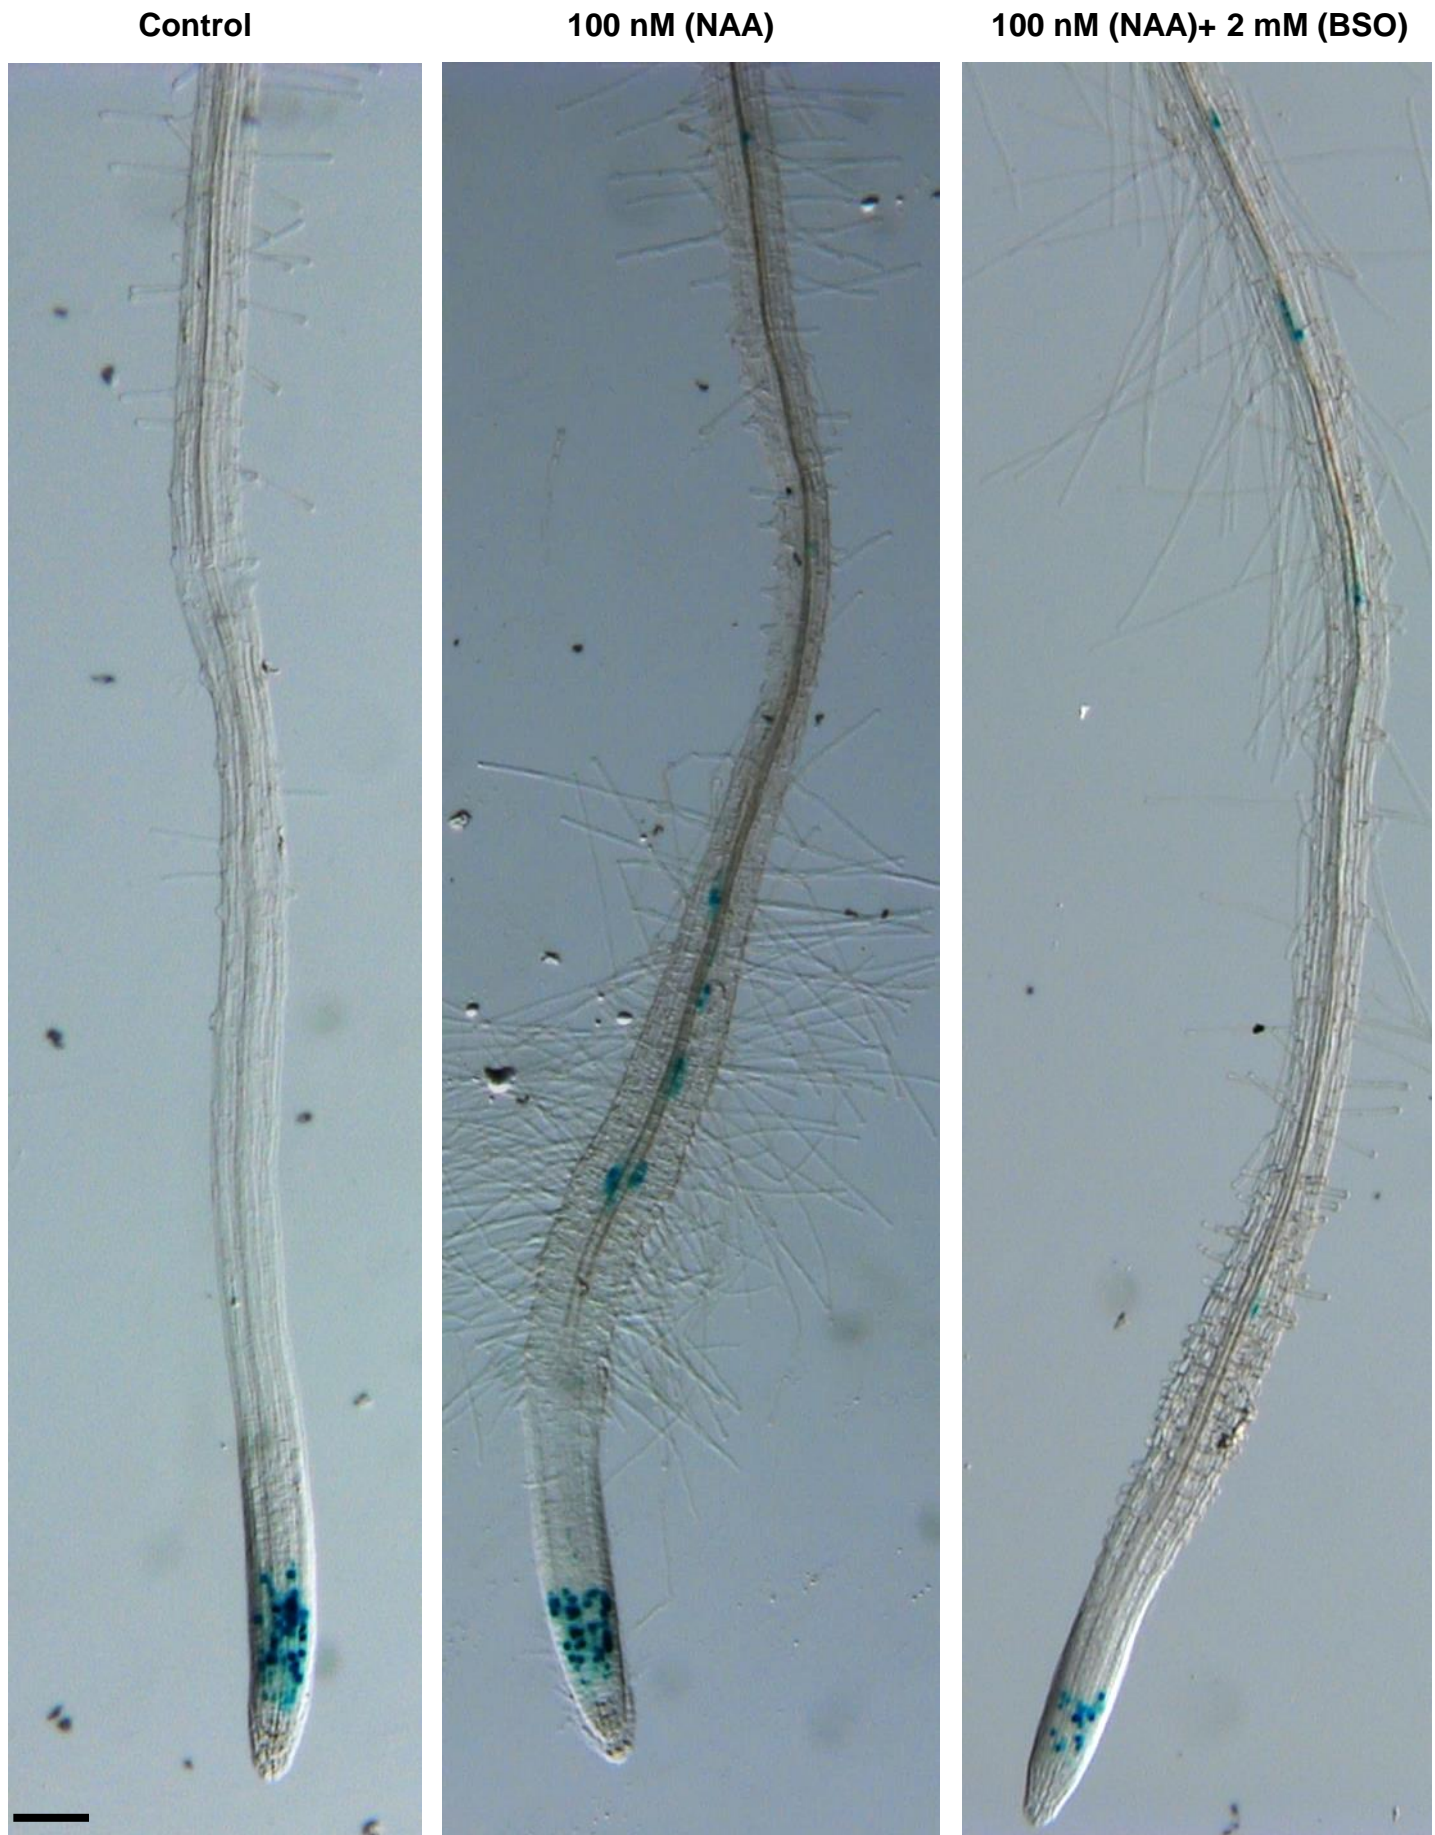

Figure S2: BSO prevents NAA-induced activation of the cell division in the distal pericycle zone. Five-day-old roots were treated with 100 nM NAA or 100 nM NAA+ 2 mM BSO for 36 hours. Scale bar is 100  $\mu$ m. CyCB1::GUS was detected.
