# Supplementary figures and images for: Glutathione Enhances Auxin Sensitivity in Arabidopsis Roots
Source: MDPI journal article supplement (doi:10.3390/biom10111550), 2020-11-13

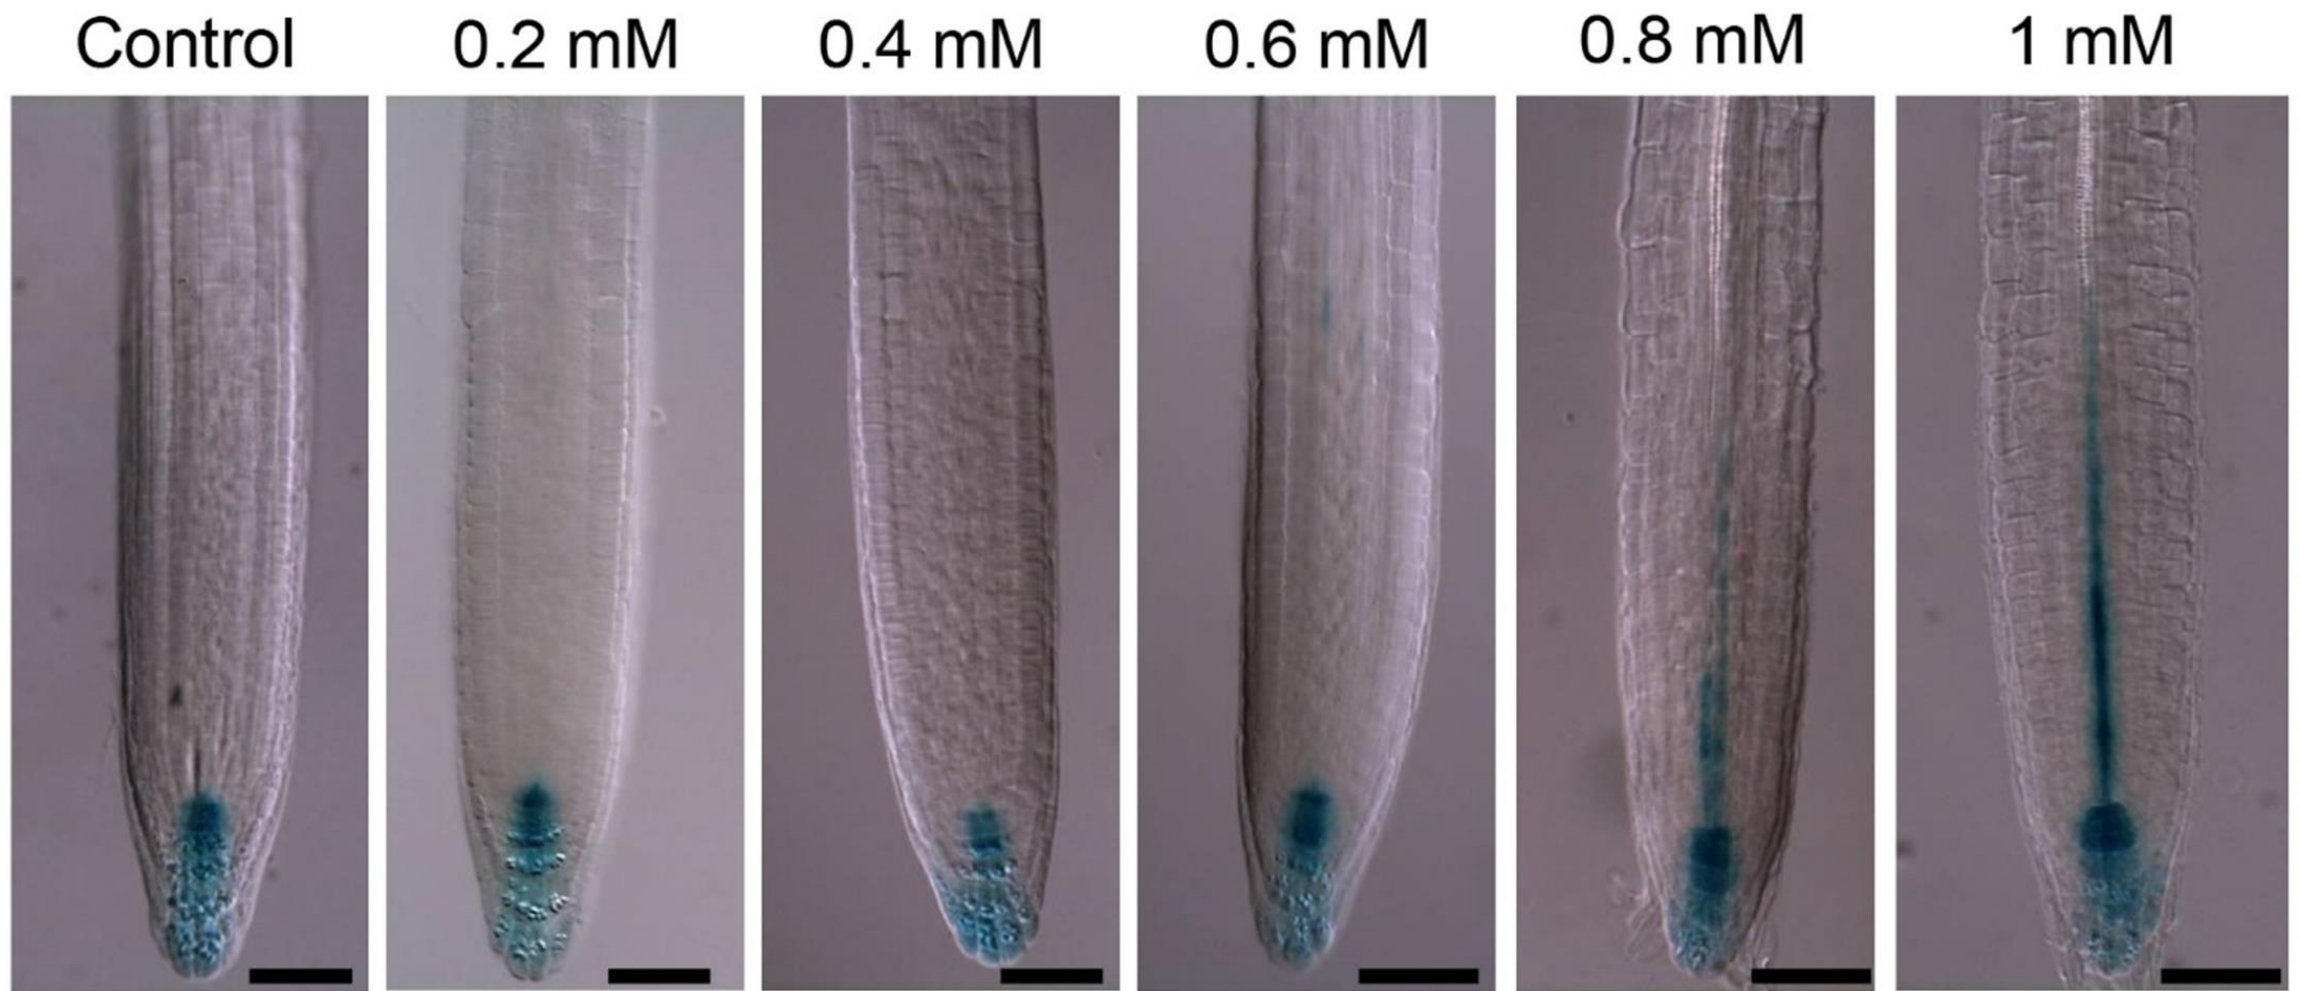

Figure S1: The effect of BSO concentrations on the DR5::GUS signal in Arabidopsis roots.

Supplement: s1 [file s1]
